# Supplementary material for: Acceptor–donor–acceptor-type molecules with large electrostatic potential difference for effective NIR photothermal therapy
Source: Royal Society of Chemistry journal article supplement (doi:10.1039/d4tb00187g), 2024-01-01
Supplement: d4tb00187g1.pdf [file d4tb00187g1.pdf]

## Supporting Information

### Acceptor-donor-acceptor-type Molecules with large electrostatic potential difference for Effective NIR Photothermal Therapy

Kexin Fan<sup>1</sup>, Ludan Zhang<sup>2</sup>, Qinqiu Zhong<sup>2</sup>, Yanhe Xiang<sup>1</sup>, Bowei Xu\*<sup>1</sup>, Yuguang Wang\*<sup>2</sup>

<sup>1</sup> State Key Laboratory of Chemical Resource Engineering, College of Materials Science and Engineering

Beijing University of Chemical Technology

Beijing 100029, China

E-mail: [xubowei@buct.edu.cn](mailto:xubowei@buct.edu.cn)

<sup>2</sup> National Engineering Laboratory for Digital and Material Technology of Stomatology Center of Digital Dentistry

Peking University School and Hospital of Stomatology

Beijing 100081, China

E-mail: [wangyuguang@bjmu.edu.cn](mailto:wangyuguang@bjmu.edu.cn)

## Structural Characterizations of Materials

Y6:  $^1\text{H NMR}$  (400 MHz, Chloroform- $d$ )  $\delta$  9.15 (s, 2H), 8.56 (dd,  $J = 10.0, 6.5$  Hz, 2H), 7.71 (t,  $J = 7.5$  Hz, 2H), 4.88 – 4.66 (m, 4H), 3.23 (s, 4H), 2.15 – 2.04 (m, 2H), 1.93 – 1.81 (m, 4H), 1.61 – 0.93 (m, 55H), 0.88 – 0.64 (m, 18H).

BTP-eC9:  $^1\text{H NMR}$  (400 MHz, Chloroform- $d$ )  $\delta$  9.18 (s, 2H), 8.80 (s, 2H), 7.96 (s, 2H), 4.85 – 4.66 (m, 4H), 3.24 (t,  $J = 7.9$  Hz, 4H), 2.17 – 2.07 (m, 2H), 1.93 – 1.83 (m, 4H), 1.28 (s, 56H), 0.88 (s, 18H), 0.73 – 0.59 (m, 13H).

GPC for PY-DT:  $M_n = 9.86$  kDa,  $M_w = 14.8$  kDa, PDI = 1.509.

GPC for PZT- $\gamma$ :  $M_n = 11.3$  kDa,  $M_w = 23.2$  kDa, PDI = 2.050.

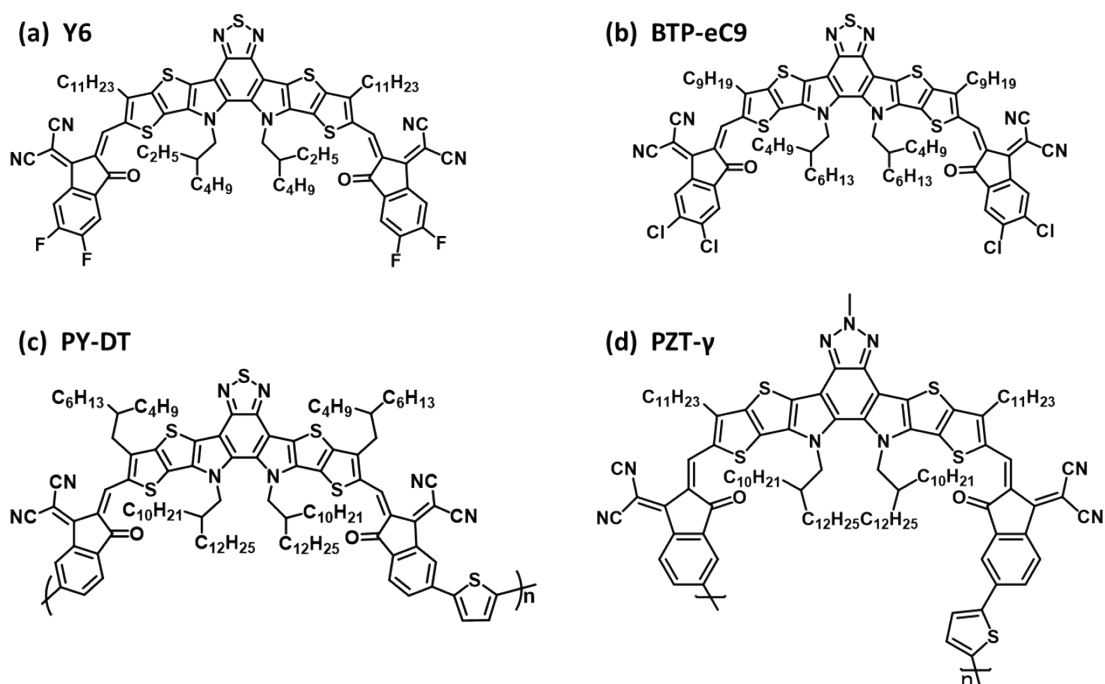

**Figure S1.** Chemical structure of four photosensitizers (a) Y6, (b) BTP-eC9, (c) PY-DT and (d) PZT- $\gamma$  used in this Work

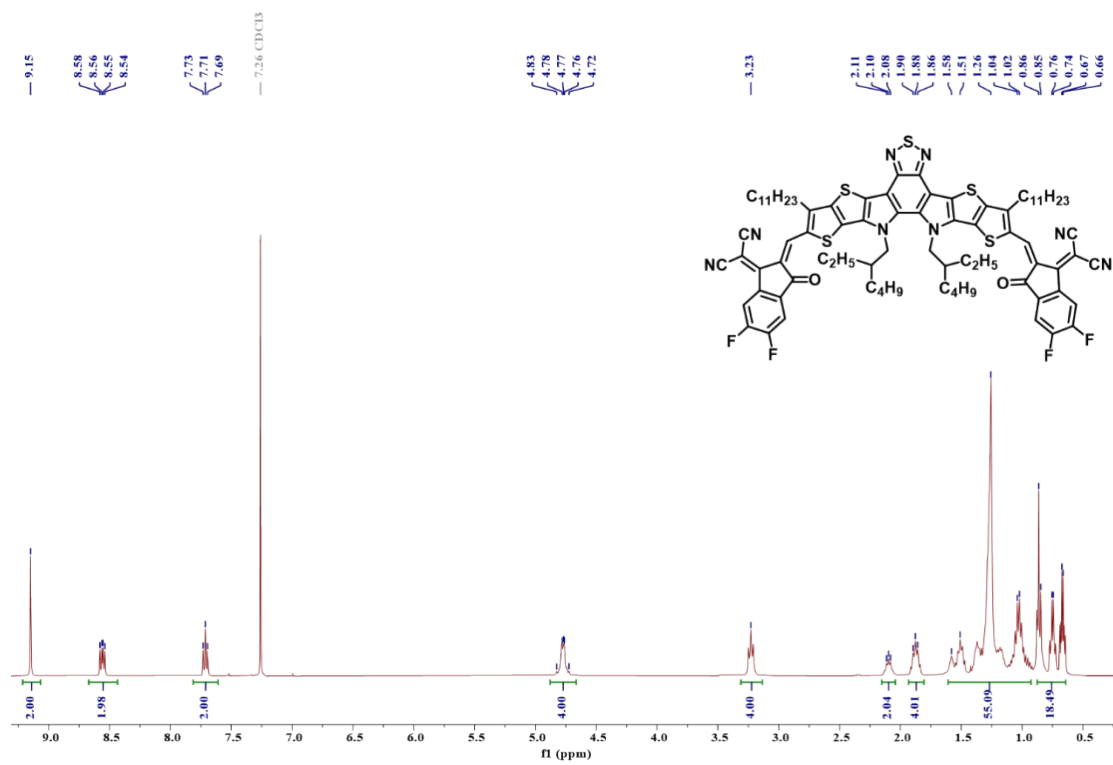

Figure S2. <sup>1</sup>H NMR (400 MHz, CDCl<sub>3</sub>) spectrum of Y6

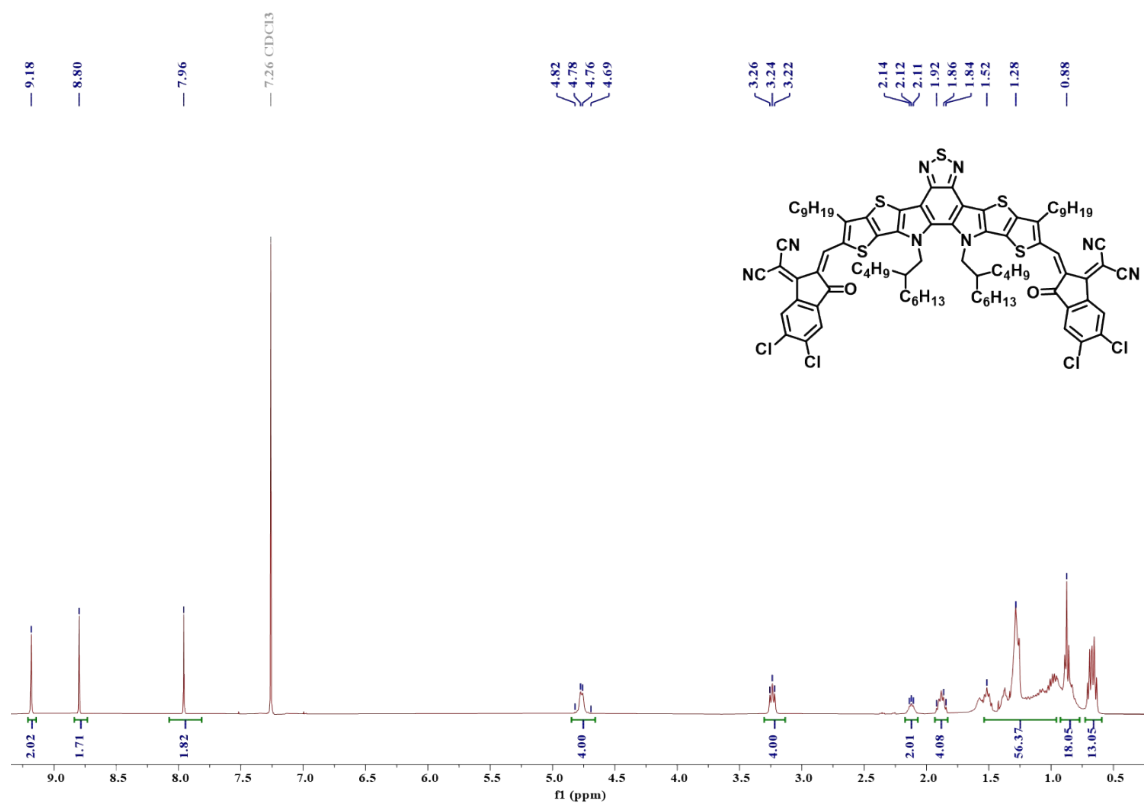

Figure S3. <sup>1</sup>H NMR (400 MHz, CDCl<sub>3</sub>) spectrum of BTP-eC9

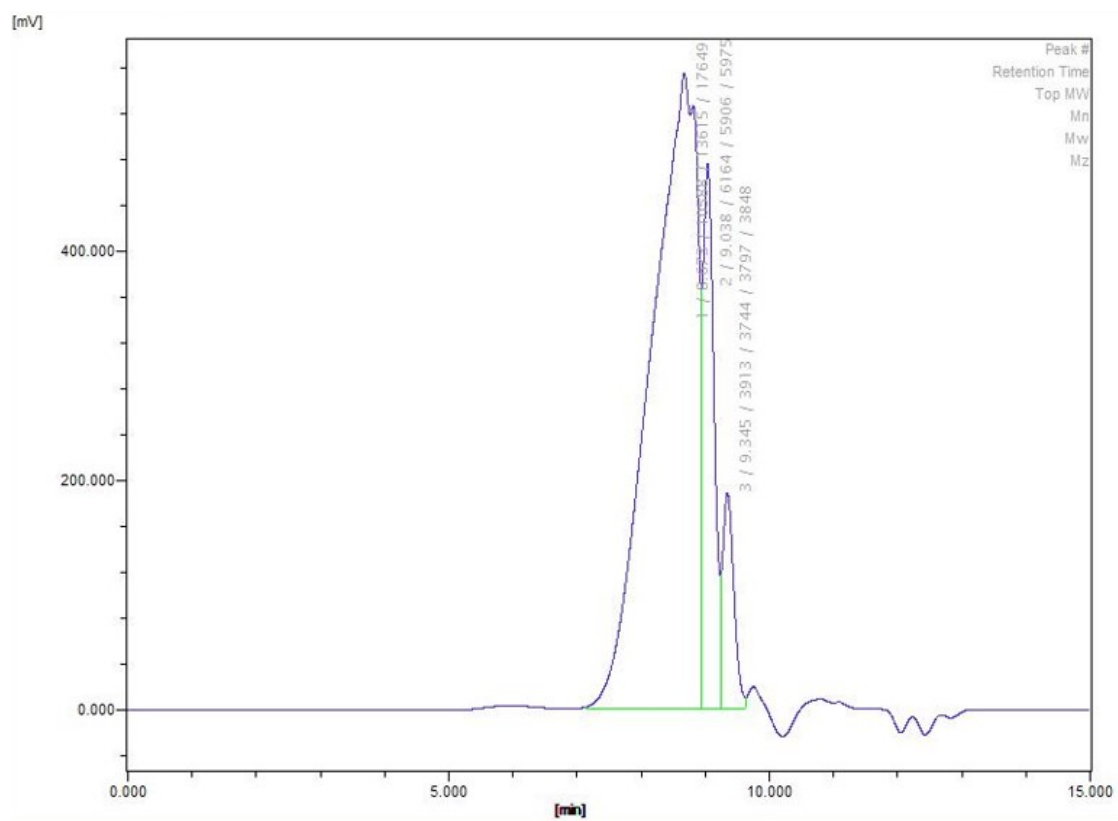

**Figure S4.** Gel-permeation chromatography data diagram for PY-DT

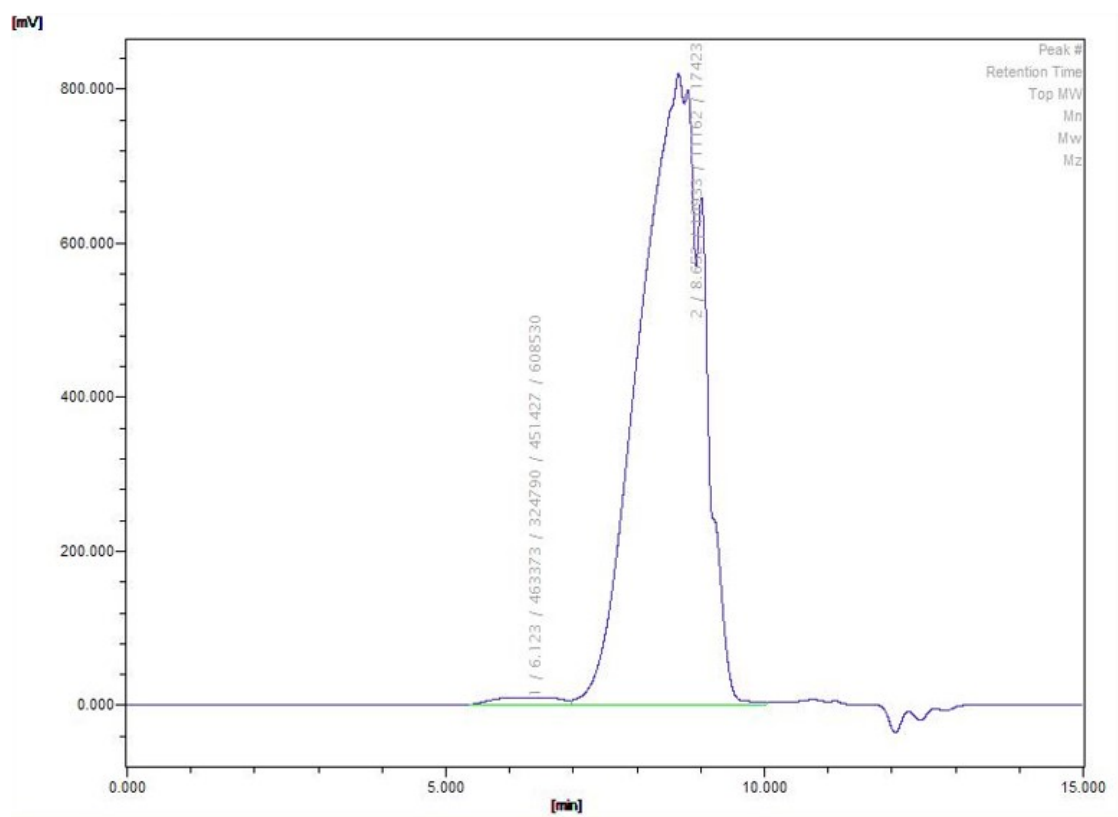

**Figure S5.** Gel-permeation chromatography data diagram for PZT-  $\gamma$

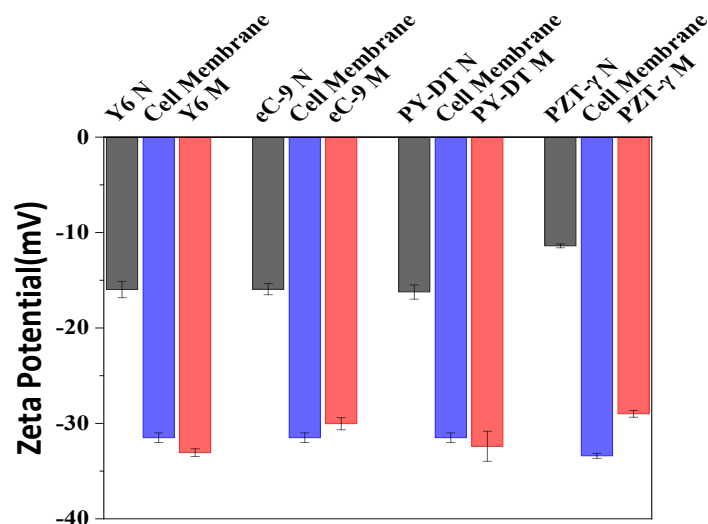

**Figure S6.** Zeta potential changes of bare NPs, Erythrocyte membrane, and Erythrocyte membrane coated NPs, respectively.

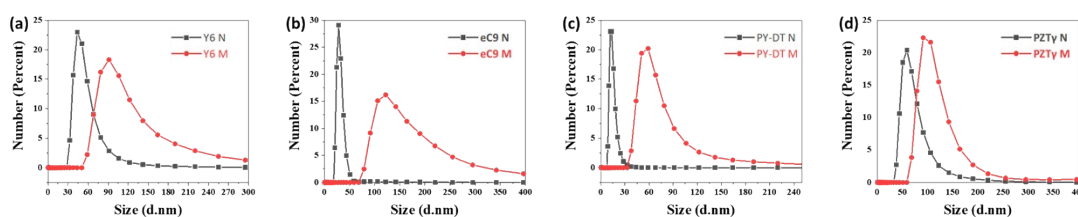

**Figure S7.** Size changes of (a) Y6, (b) BTP-eC9, (c) PY-DT and (d) PZT- $\gamma$  NPs before and after coating with Erythrocyte membrane.

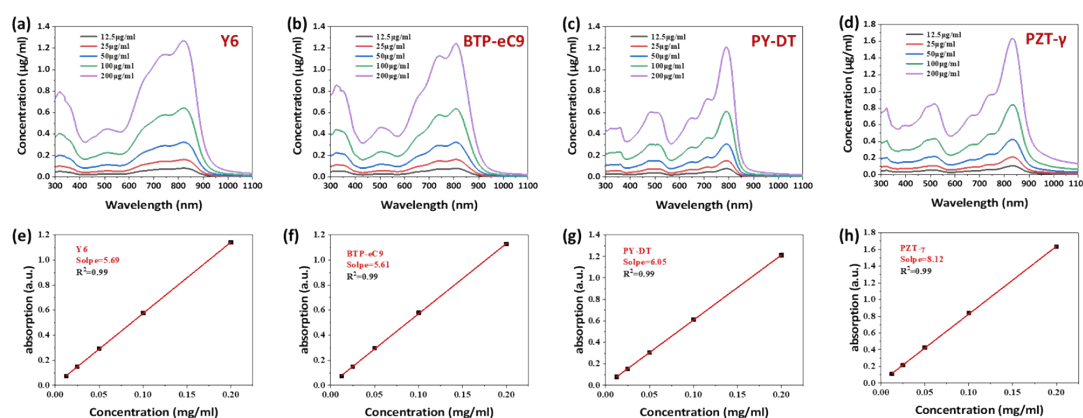

**Figure S8.** Measurement of the mass extinction coefficient of NPs in water. UV-vis-NIR spectra with (a) Y6, (b) BTP-eC9, (c) PY-DT and (d) PZT- $\gamma$  NPs in water at different concentrations .Absorbance of NPs at 808 nm plotted as a function of the concentration of NPs in water. The slopes represent the mass extinction coefficients of (e) Y6, (f) BTP-eC9, (g) PY-DT and (h) PZT- $\gamma$  NPs at

808 nm in water. The slope represents the mass extinction coefficient of PQIA-BDTP NPs at 808 nm in water.

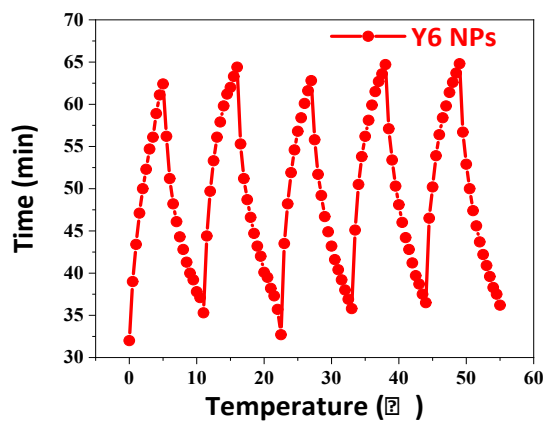

**Figure S9.** Temperature profiles of Y6 NPs aqueous solution for five ON/OFF cycles.

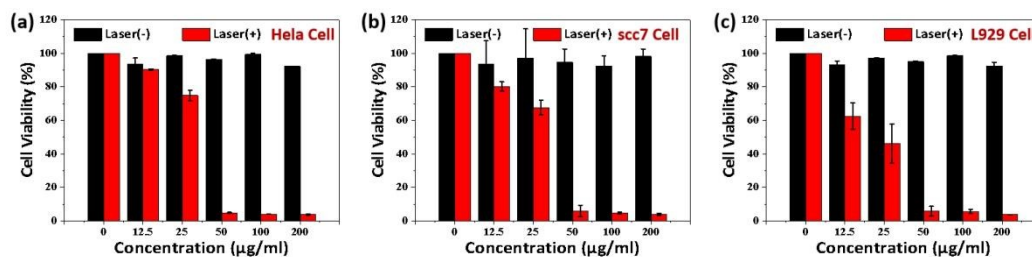

**Figure S10.** In vitro cytotoxicity of the Y6 NPs. Viability of (a) HeLa, (b) scc7, (c) L929 cells incubated at varying concentrations with or without 808 nm laser irradiation for 10 min ( $1 \text{ W} \cdot \text{cm}^{-2}$ ).
